# Supplementary material for: Molecular determinants and mechanism for antibody cocktail preventing SARS-CoV-2 escape
Source: PubMed Central journal article supplement (PMC7817669; doi:10.1038/s41467-020-20789-7), 2021-01-20
Supplement: 41467_2020_20789_MOESM1_ESM.pdf [file 41467_2020_20789_MOESM1_ESM.pdf]

# 1 Supplementary Figures and Tables

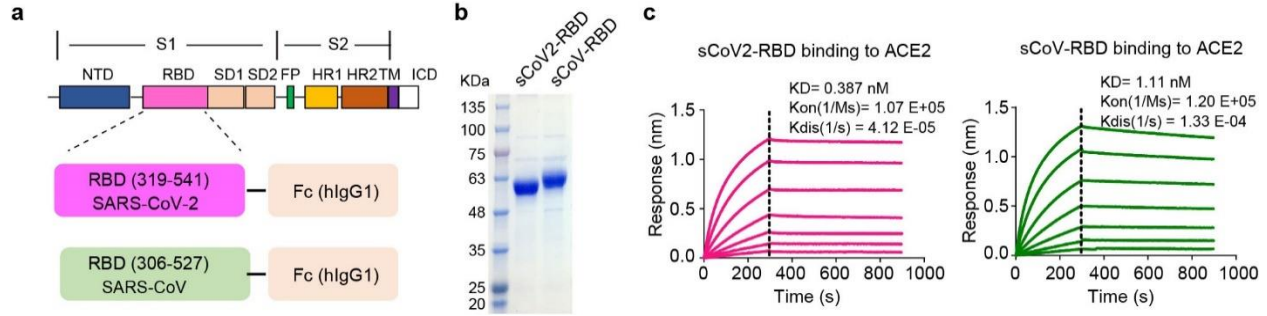

2

3 **Supplementary Fig. 1. Expression and characterization of the RBD proteins.** a Structures of  
4 the SARS-CoV-2 spike protein and the RBD-Fc fusion proteins. NTD: N-terminal domain, RBD:  
5 receptor-binding domain, SD1: subdomain 1, SD2: subdomain 2, FP: fusion peptide, HR1: heptad  
6 repeat 1, HR2: heptad repeat 2, TM: transmembrane region, IC: intracellular domain. b SDS-  
7 PAGE of purified sCoV2-RBD and sCoV-RBD proteins. c Kinetic binding curves of the sCoV2-  
8 RBD and the sCoV-RBD to ACE2.

**a**

| mAb       | VH              |            |                 |              |                           | Vk/L          |            |              |                           |
|-----------|-----------------|------------|-----------------|--------------|---------------------------|---------------|------------|--------------|---------------------------|
|           | V-GENE          | J-GENE     | D-GENE          | Identity (%) | Length of CDR [ 1, 2, 3 ] | V-GENE        | J-GENE     | Identity (%) | Length of CDR [ 1, 2, 3 ] |
| * CoV2-01 | IGHV1-2*02 F    | IGHJ4*02 F | IGHD3-16*01 F   | 96.53        | [8.8.20]                  | IGKV1-39*01 F | IGKJ5*01 F | 97.49        | [6.3.9]                   |
| CoV2-02   | IGHV1-2*02 F    | IGHJ4*02 F | IGHD3-16*01 F   | 96.88        | [8.8.20]                  | IGKV1-39*01 F | IGKJ4*01 F | 94.62        | [6.3.9]                   |
| CoV2-03   | IGHV1-2*02 F    | IGHJ4*02 F | IGHD3-16*01 F   | 96.53        | [8.8.20]                  | IGKV1-39*01 F | IGKJ1*01 F | 99.64        | [6.3.9]                   |
| CoV2-04   | IGHV4-34*01 F   | IGHJ5*02 F | IGHD6-13*01 F   | 92.28        | [8.7.18]                  | IGKV1-39*01 F | IGKJ4*01 F | 97.13        | [6.3.9]                   |
| CoV2-05   | IGHV3-20*04 F   | IGHJ2*01 F | IGHD4-17*01 F   | 94.10        | [8.8.14]                  | IGLV2-11*01 F | IGLJ3*02 F | 96.53        | [9.3.10]                  |
| * CoV2-06 | IGHV4-4*02 F    | IGHJ4*02 F | IGHD6-13*01 F   | 94.44        | [9.7.14]                  | IGLV2-14*01 F | IGLJ2*01 F | 99.31        | [9.3.10]                  |
| * CoV2-09 | IGHV4-34*01 F   | IGHJ5*02 F | IGHD6-13*01 F   | 92.28        | [8.7.18]                  | IGLV3-19*01 F | IGLJ2*01 F | 92.47        | [6.3.11]                  |
| CoV2-11   | IGHV3-9*01 F    | IGHJ4*02 F | IGHD3-22*01 F   | 95.83        | [8.8.15]                  | IGLV3-21*04 F | IGLJ1*01 F | 88.53        | [6.3.11]                  |
| CoV2-12   | IGHV3-30-3*01 F | IGHJ4*02 F | IGHD3-10*01 F   | 90.97        | [8.8.16]                  | IGKV1-39*01 F | IGKJ2*01 F | 99.28        | [6.3.10]                  |
| CoV2-13   | IGHV1-69*01 F   | IGHJ4*02 F | IGHD3-10*01 F   | 90.28        | [8.8.12]                  | IGKV1-17*01 F | IGKJ1*01 F | 98.21        | [6.3.9]                   |
| * CoV2-14 | IGHV6-1*01 F    | IGHJ6*02 F | IGHD6-13*01 F   | 100.00       | [10.9.18]                 | IGLV2-14*01 F | IGLJ2*01 F | 96.53        | [9.3.8]                   |
| * CoV2-15 | IGHV6-1*01 F    | IGHJ6*02 F | IGHD6-13*01 F   | 100.00       | [10.9.18]                 | IGLV2-8*01 F  | IGLJ2*01 F | 73.61        | [9.3.9]                   |
| * CoV2-16 | IGHV4-34*01 F   | IGHJ5*02 F | IGHD6-13*01 F   | 91.93        | [8.7.18]                  | IGLV1-44*01 F | IGLJ1*01 F | 89.47        | [8.3.11]                  |
| * CoV2-17 | IGHV3-21*01 F   | IGHJ3*02 F | IGHD5-12*01 F   | 99.31        | [8.8.18]                  | IGLV1-47*01 F | IGLJ1*01 F | 98.25        | [8.3.11]                  |
| * CoV2-18 | IGHV1-69*06 F   | IGHJ3*02 F | IGHD3-9*01 F    | 96.53        | [8.8.19]                  | IGLV1-44*01 F | IGLJ1*01 F | 94.74        | [6.3.11]                  |
| CoV2-19   | IGHV1-2*02 F    | IGHJ4*02 F | IGHD3-16*01 F   | 96.53        | [8.8.20]                  | IGKV1-39*01 F | IGKJ3*01 F | 93.19        | [6.3.9]                   |
| CoV2-20   | IGHV3-9*01 F    | IGHJ3*01 F | IGHD4-23*01 ORF | 88.54        | [8.8.14]                  | IGKV1-39*01 F | IGKJ5*01 F | 94.62        | [6.3.10]                  |
| CoV2-22   | IGHV1-2*02 F    | IGHJ4*02 F | IGHD3-16*01 F   | 97.22        | [8.8.20]                  | IGKV1-39*01 F | IGKJ3*01 F | 98.57        | [6.3.9]                   |
| CoV2-23   | IGHV3-9*01 F    | IGHJ4*02 F | IGHD3-10*01 F   | 97.92        | [8.8.14]                  | IGKV1-12*01 F | IGKJ2*01 F | 94.27        | [6.3.9]                   |
| CoV2-24   | IGHV4-34*01 F   | IGHJ3*02 F | IGHD1-26*01 F   | 91.58        | [8.7.12]                  | IGLV3-21*02 F | IGLJ1*01 F | 93.55        | [6.3.11]                  |
| * CoV2-25 | IGHV1-2*06 F    | IGHJ4*02 F | No result       | 99.31        | [8.8.7]                   | IGLV1-44*01 F | IGLJ2*01 F | 98.60        | [8.3.11]                  |
| * CoV2-26 | IGHV1-2*06 F    | IGHJ4*02 F | No result       | 99.31        | [8.8.7]                   | IGLV1-44*01 F | IGLJ2*01 F | 97.19        | [8.3.11]                  |
| CoV2-27   | IGHV4-34*01 F   | IGHJ5*02 F | IGHD6-13*01 F   | 92.28        | [8.7.18]                  | IGLV1-44*01 F | IGLJ3*02 F | 94.74        | [8.3.11]                  |
| CoV2-28   | IGHV1-69*12 F   | IGHJ3*02 F | IGHD1-26*01 F   | 99.65        | [8.8.15]                  | IGLV2-14*01 F | IGLJ1*01 F | 98.26        | [9.3.10]                  |
| * CoV2-29 | IGHV3-7*03 F    | IGHJ6*03 F | IGHD3-3*01 F    | 99.31        | [8.8.19]                  | IGLV2-14*01 F | IGLJ2*01 F | 98.96        | [9.3.10]                  |
| CoV2-31   | IGHV4-34*01 F   | IGHJ5*02 F | IGHD2-2*01 F    | 93.68        | [8.7.18]                  | IGLV3-9*01 F  | IGLJ1*01 F | 96.77        | [6.3.9]                   |
| CoV2-32   | IGHV3-9*01 F    | IGHJ3*02 F | IGHD4-17*01 F   | 94.10        | [8.8.16]                  | IGLV1-40*01 F | IGLJ1*01 F | 98.61        | [9.3.11]                  |
| CoV2-33   | IGHV3-9*01 F    | IGHJ6*02 F | IGHD3-10*01 F   | 96.53        | [8.8.16]                  | IGLV2-14*01 F | IGLJ2*01 F | 97.57        | [9.3.11]                  |
| CoV2-34   | IGHV4-34*01 F   | IGHJ5*02 F | IGHD2-21*02 F   | 91.93        | [8.7.18]                  | IGKV1-39*01 F | IGKJ5*01 F | 91.76        | [6.3.9]                   |
| CoV2-35   | IGHV4-34*01 F   | IGHJ5*02 F | IGHD6-13*01 F   | 93.68        | [8.7.18]                  | IGLV3-21*04 F | IGLJ2*01 F | 94.62        | [6.3.10]                  |

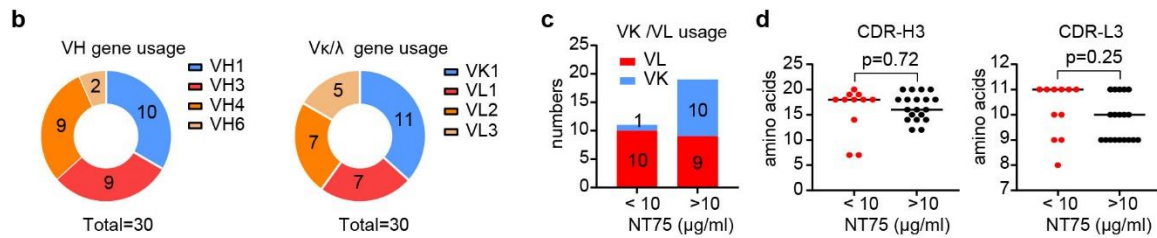

9

10 **Supplementary Fig. 2. Germline gene origins, V-region identities, and the length of CDRs**  
11 **for the variable heavy and light chains. a** Germline gene origins, V-region identities, and the  
12 length of CDRs for the variable heavy and light chains. The stars indicate the 11 antibodies with  
13  $NT_{75} < 10 \mu\text{g/ml}$  with the five most potent neutralizing antibodies marked with a red asterisk “\*”.  
14 **b** The germline gene classes for the variable heavy (VH) and the variable light chains (VK/L) of  
15 the SARS-CoV-2 antibodies. The numbers for each V gene used are indicated in the pie chart. **c**  
16 Comparison of the numbers of kappa light chain (VK) and lambda light chain (VL) used in the  
17 two groups of antibodies with  $NT_{75} < 10 \mu\text{g/ml}$  and  $NT_{75} > 10 \mu\text{g/ml}$ . **d** Comparison of the amino  
18 acid numbers of the heavy chain CDR3 (CDR-H3) and the light chain CDR3 (CDR-L3) in the two  
19 groups of SARS-CoV-2 antibodies with  $NT_{75} < 10 \mu\text{g/ml}$  and  $NT_{75} > 10 \mu\text{g/ml}$ . Two-tailed Student’s  
20 t-test.

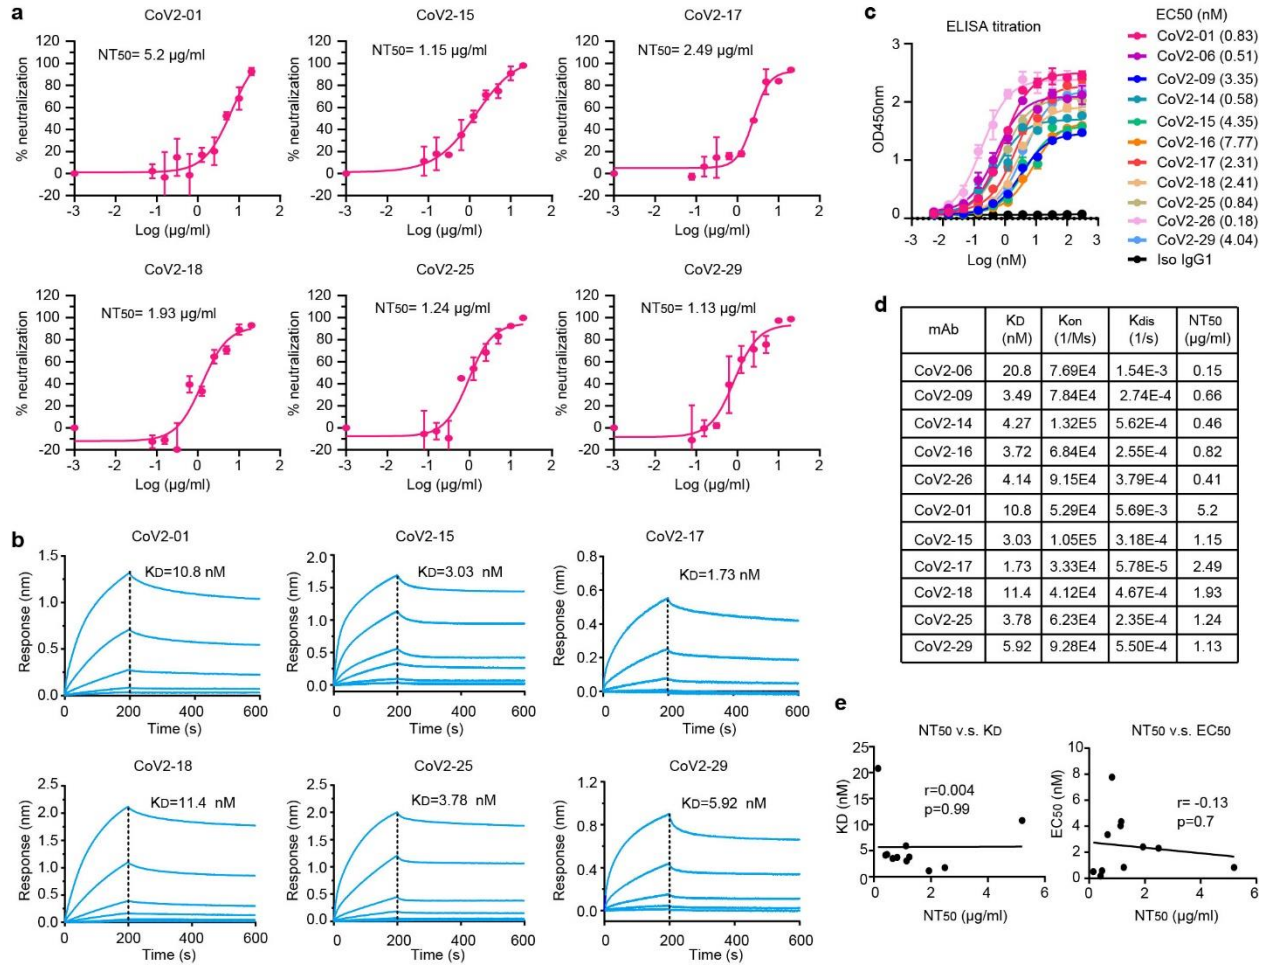

21

22 **Supplementary Fig. 3. Neutralization, RBD binding and RBD/ACE2 blocking activities of**  
 23 **additional mAbs. a** Neutralization titration of the six remaining mAbs of the 11 mAbs with  
 24 neutralizations above 75% at 10  $\mu\text{g/ml}$ . Error bars indicate SD of duplicates. **b** Kinetic binding  
 25 curves of the six mAbs to the RBD protein of SARS-CoV-2. **c** ELISA titration and determination  
 26 of the 50% effective binding concentration ( $\text{EC}_{50}$ ) of the 11 neutralizing antibodies to sCoV2-  
 27 RBD. Each data point is the mean  $\pm$  SD of two replicates. **d** A summary of the binding affinities  
 28 ( $K_D$ ), association constant ( $K_{on}$ ), dissociation constant ( $K_{dis}$ ), the 50% inhibition concentration  
 29 ( $\text{IC}_{50}$ ) of receptor blocking, and the  $\text{NT}_{50}$  of the 11 neutralizing antibodies. **e** The correlation  
 30 between  $\text{NT}_{50}$  and the affinity  $K_D$  and between  $\text{NT}_{50}$  and the ELISA binding  $\text{EC}_{50}$  for each of the  
 31 11 mAbs. Pearson correlations were performed using Graphpad prism 8.

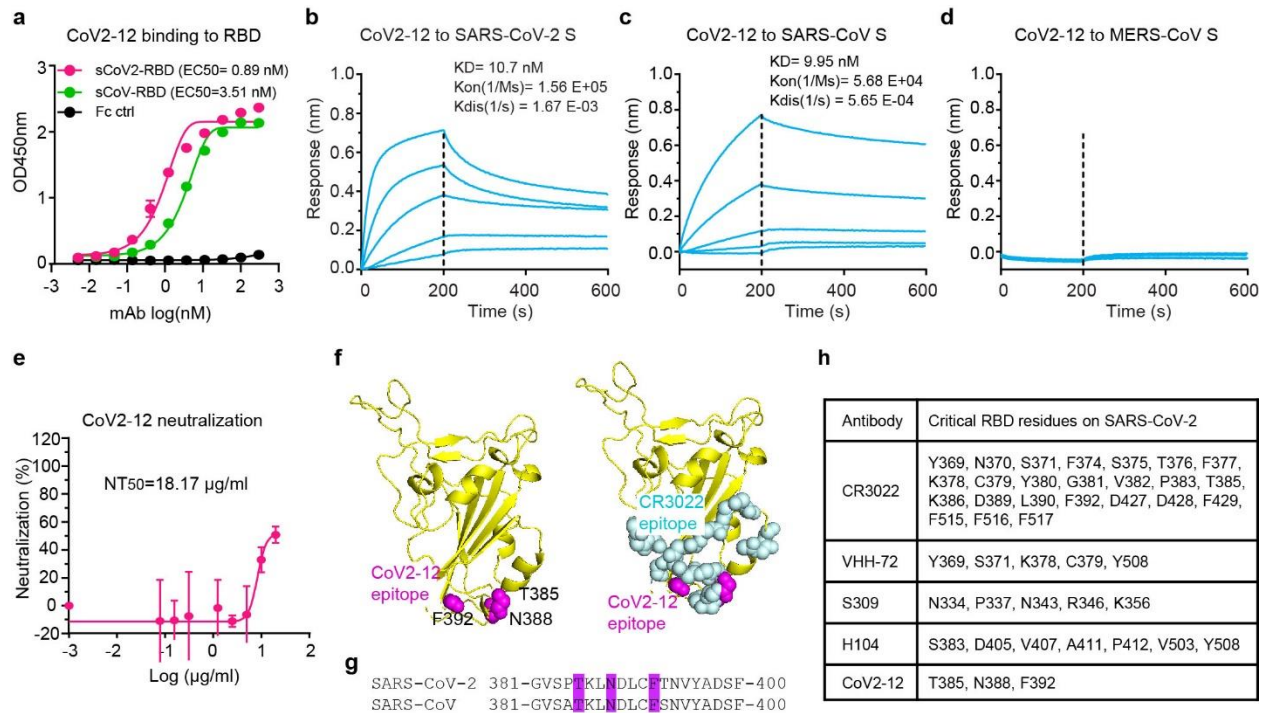

32  
 33 **Supplementary Fig. 4. A conserved epitope determined by the SARS-CoV-2 neutralizing and**  
 34 **SARS-CoV cross-reactive mAb CoV2-12. a** ELISA titration and determination of the 50%  
 35 effective binding concentration ( $EC_{50}$ ) of CoV2-12 to indicated the RBD proteins SARS-CoV and  
 36 SARS-CoV-2. Data points are mean  $\pm$  SD of two replicates. **b-d** Kinetic binding curves of CoV2-  
 37 12 to the S protein of SARS-CoV-2 (**b**), SARS-CoV (**c**) and MERS-CoV (**d**). The dashed lines  
 38 indicate the separation of association and dissociation phases. **e** SARS-CoV-2 neutralization  
 39 titration of CoV-12. Data points are mean  $\pm$  SD of two replicates. **f** The critical residues for CoV2-  
 40 12 binding are shown as magenta spheres in the RBD structure and their locations relative to the  
 41 epitope residues (colored in pale cyan) of the CR3022 mAb. **g** Alignment of the CoV2-12 binding  
 42 residues on the RBD of SARS-CoV-2 and SARS-CoV. **h** Summary of the critical RBD residues  
 43 on SARS-CoV-2 for CoV2-12 and the indicated cross-reactive mAbs.



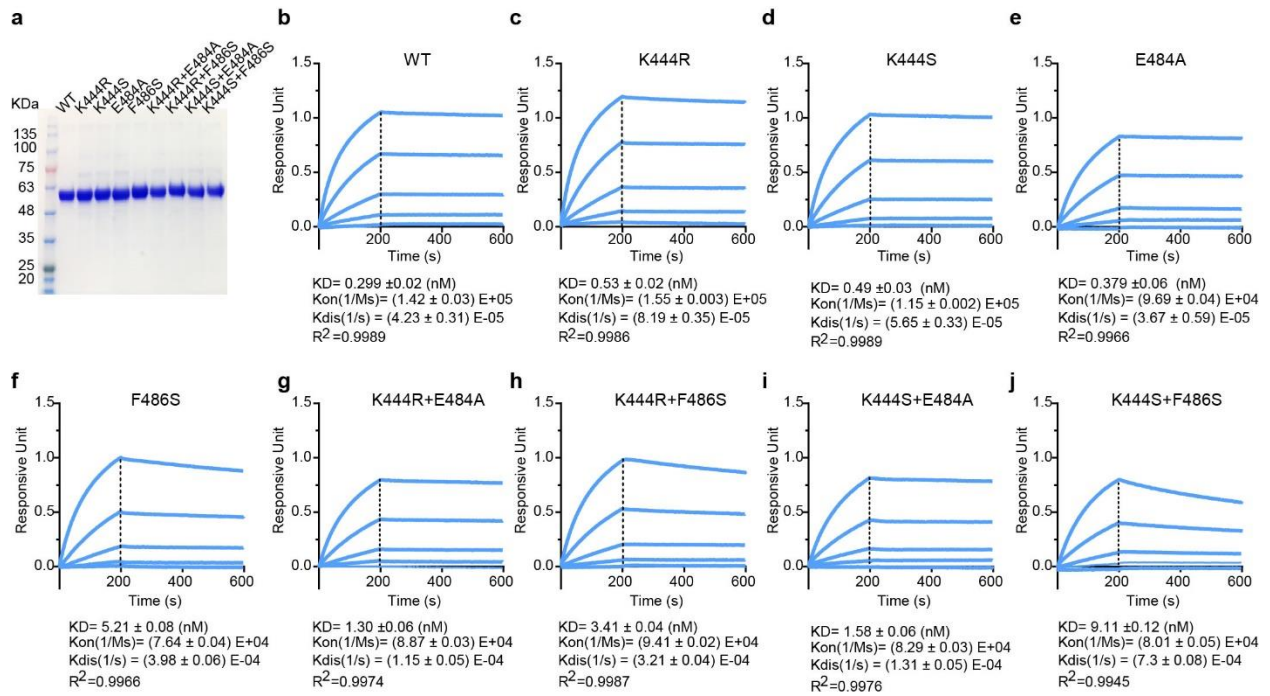

44

45 **Supplementary Fig. 5. Expression of sCoV2-RBD mutant proteins and characterization of**  
 46 **their affinities to ACE2. a** SDS-PAGE and coomassie blue staining of the purified sCoV2-RBD  
 47 proteins with indicated amino acid mutations. **b-j** Kinetic binding curves of the sCoV2-RBD wild  
 48 type or mutant proteins to human ACE2.

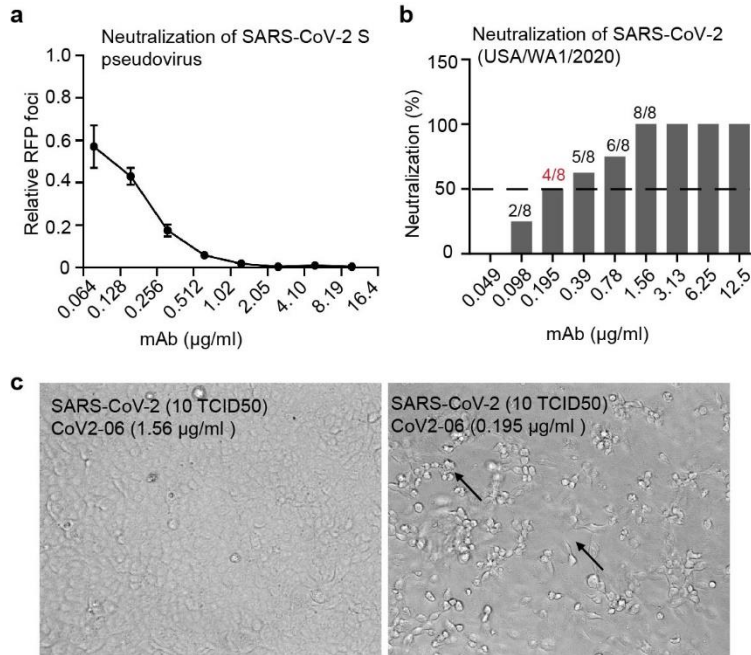

49

50 **Supplementary Fig. 6. Validation of CoV2-06 neutralization against SARS-CoV-2 S**  
 51 **pseudovirus and SARS-CoV-2 clinical isolate. a** SARS-CoV-2 S pseudovirus neutralization  
 52 assay with CoV2-06. The numbers of the red-fluorescent protein (RFP) focus were counted and  
 53 their ratio relative to the control group without antibody were calculated and plotted as the Y-axis.  
 54 Data points are mean  $\pm$  SD of triplicates. **b** Percent neutralization of SARS-CoV-2 clinical isolate  
 55 (USA/WA1/2020) infection as determined by visualizing the CPE of cells. The number of wells  
 56 without CPE relative to the total 8 replicate wells shown on top of each bar. The dashed line  
 57 indicates 50% of neutralization. **c** Representative images of protected and infected cells. The CPE,  
 58 including cell detachment and syncytium, are indicated by arrows.

| <b>Mutation</b> | <b>CoV2-06</b> | <b>CoV2-14</b> | <b>CoV2-12</b> | <b>CoV2-09</b> | <b>CoV2-16</b> | <b>CoV2-26</b> |
|-----------------|----------------|----------------|----------------|----------------|----------------|----------------|
| T345A           | 21 (1)         | 123 (4)        | 40 (9)         | 56 (1)         | 33 (4)         | 103 (9)        |
| R346A           | 1 (0)          | 93 (1)         | 81 (7)         | 145 (4)        | 158 (8)        | 106 (4)        |
| S349A           | 48 (3)         | 60 (7)         | 42 (0)         | 6 (0)          | 2 (0)          | 52 (6)         |
| T385A           | 91 (4)         | 101 (3)        | 11 (5)         | 115 (8)        | 113 (4)        | 97 (5)         |
| N388A           | 68 (1)         | 74 (7)         | 23 (8)         | 74 (3)         | 58 (6)         | 72 (6)         |
| F392A           | 86 (0)         | 103 (5)        | 7 (3)          | 112 (2)        | 114 (1)        | 93 (1)         |
| K444A           | 2 (1)          | 102 (6)        | 135 (5)        | 91 (1)         | 96 (5)         | 105 (4)        |
| G446A           | 7 (0)          | 82 (3)         | 74 (0)         | 2 (1)          | 1 (0)          | 56 (2)         |
| G447A           | 1 (0)          | 97 (1)         | 66 (3)         | 0 (0)          | 1 (0)          | 85 (13)        |
| N448A           | 21 (0)         | 49 (2)         | 55 (6)         | 0 (0)          | 0 (0)          | 31 (3)         |
| Y449A           | 0 (0)          | 97 (3)         | 158 (7)        | 0 (0)          | 1 (1)          | 72 (3)         |
| N450A           | 19 (1)         | 85 (2)         | 220 (36)       | 1 (0)          | 1 (0)          | 71 (7)         |
| L452A           | 112 (0)        | 115 (1)        | 134 (3)        | 0 (0)          | 0 (0)          | 103 (2)        |
| F456A           | 85 (1)         | 21 (2)         | 135 (4)        | 74 (0)         | 66 (2)         | 45 (2)         |
| A475S           | 77 (4)         | 8 (1)          | 106 (0)        | 93 (7)         | 85 (0)         | 94 (9)         |
| E484A           | 56 (1)         | 2 (0)          | 93 (4)         | 5 (0)          | 1 (0)          | 105 (2)        |
| G485A           | 74 (4)         | 62 (1)         | 70 (3)         | 106 (0)        | 77 (3)         | 15 (9)         |
| F486A           | 108 (2)        | 1 (0)          | 168 (2)        | 113 (2)        | 106 (2)        | 12 (4)         |
| N487A           | 66 (0)         | 61 (1)         | 55 (2)         | 93 (1)         | 74 (0)         | 25 (2)         |
| Y489A           | 74 (1)         | 1 (0)          | 91 (19)        | 52 (6)         | 52 (3)         | 10 (6)         |
| F490A           | 86 (2)         | 75 (1)         | 123 (12)       | 0 (0)          | 1 (0)          | 109 (0)        |
| G496A           | 88 (12)        | 102 (9)        | 143 (10)       | 12 (1)         | 4 (0)          | 104 (1)        |

59

60 **Supplementary Table 1. Residues critical for mAb binding to SARS-CoV-2 S protein RBD.**

61 The mAb reactivity for each alanine scan mutant are expressed as percent of binding to wildtype  
62 S protein, with ranges (half of the maximum minus minimum values) in parentheses. At least two  
63 replicate values were obtained for each experiment. Values are shaded in grey for critical residues.

| <b>Primers for constructing RBD expressing vectors</b> | <b>Forward primer</b>                     | <b>Reverse primer</b>                    |
|--------------------------------------------------------|-------------------------------------------|------------------------------------------|
| SCoV2-RBD                                              | ACAGGTGTCCACTCGCTAGCTAGAGTGCAGCCTACCGAGA  | GTGAACCGCCTCCACCTGCGCAGAAGTTCACGCATTTGTT |
| K444R overlap                                          | AGCAACAACCTGGACAGCCGGTTCGGCGGCAAC         | GTTGCCCGCCGACCCGGCTGTCCAGGTTGTTGCT       |
| K444S overlap                                          | AGCAACAACCTGGACAGCTCCGTTCGGCGGCAAC        | GTTGCCCGCCGACGGAGCTGTCCAGGTTGTTGCT       |
| E484A overlap                                          | ACCCCTTGCAATGGCGTGGCCGGCTTCAACTGCTACTTC   | GAAGTAGCAGTTGAAGCCGGCCACGCCATTGCAAGGGGT  |
| F486S overlap                                          | TGCAATGGCGTGGAAAGGCTCCAACCTGCTACTTCCCACTG | CAGTGGGAAGTAGCAGTTGGAGCCTTCCACGCCATTGCA  |
| N501A overlap                                          | TACGGCTTCCAGCCTACAGCCGGCTGGGGTACCAGCCT    | AGGCTGGTAGCCACGCCGGCTGTAGGCTGGAAGCCGTA   |
| <b>Primers for scFv sequencing</b>                     | <b>Forward primer</b>                     |                                          |
| PSCFVF                                                 | GAAATACCTGCTGCCGACTG                      |                                          |
| <b>Primers for virus sequencing</b>                    | <b>Forward primer</b>                     | <b>Reverse primer</b>                    |
| cov-21521V                                             | tggtatcttagtgatggtcttg                    |                                          |
| cov-22092V                                             | tggacctgaaggaaaac                         |                                          |
| cov-22685V                                             | tccacttttaagtgttatggag                    |                                          |
| cov-23203V                                             | aggcacaggtgttcttac                        |                                          |
| cov-23840V                                             | gtacacaattaaaccgtgc                       |                                          |
| cov-24428V                                             | cacaagctttaaacacgc                        |                                          |
| cov-25068V                                             | tctctggcattaatgcttc                       |                                          |
| cov-25238R                                             |                                           | CAATCAAGCCAGCTATAAAACC                   |
| <b>Primers for virus construction</b>                  | <b>Forward primer</b>                     | <b>Reverse primer</b>                    |
| K444R SARS-CoV-2                                       | ctaacaatcttgattctaGggttggtggaattataattac  | caccaaccCtagaatcaagattgtag               |
| E484A SARS-CoV-2                                       | ggttgCaggttttaattgttactttcctttac          | ggaaagtaacaattaaaacctGcaacaccattacaagtg  |

64

65 **Supplementary Table 2.** Primers for gene cloning, virus sequencing, virus construction.
